# Supplementary material for: Deletion of Hnrnpk Gene Causes Infertility in Male Mice by Disrupting Spermatogenesis
Source: MDPI journal article supplement (doi:10.3390/cells11081277), 2022-04-09
Supplement: s1 [file s1]

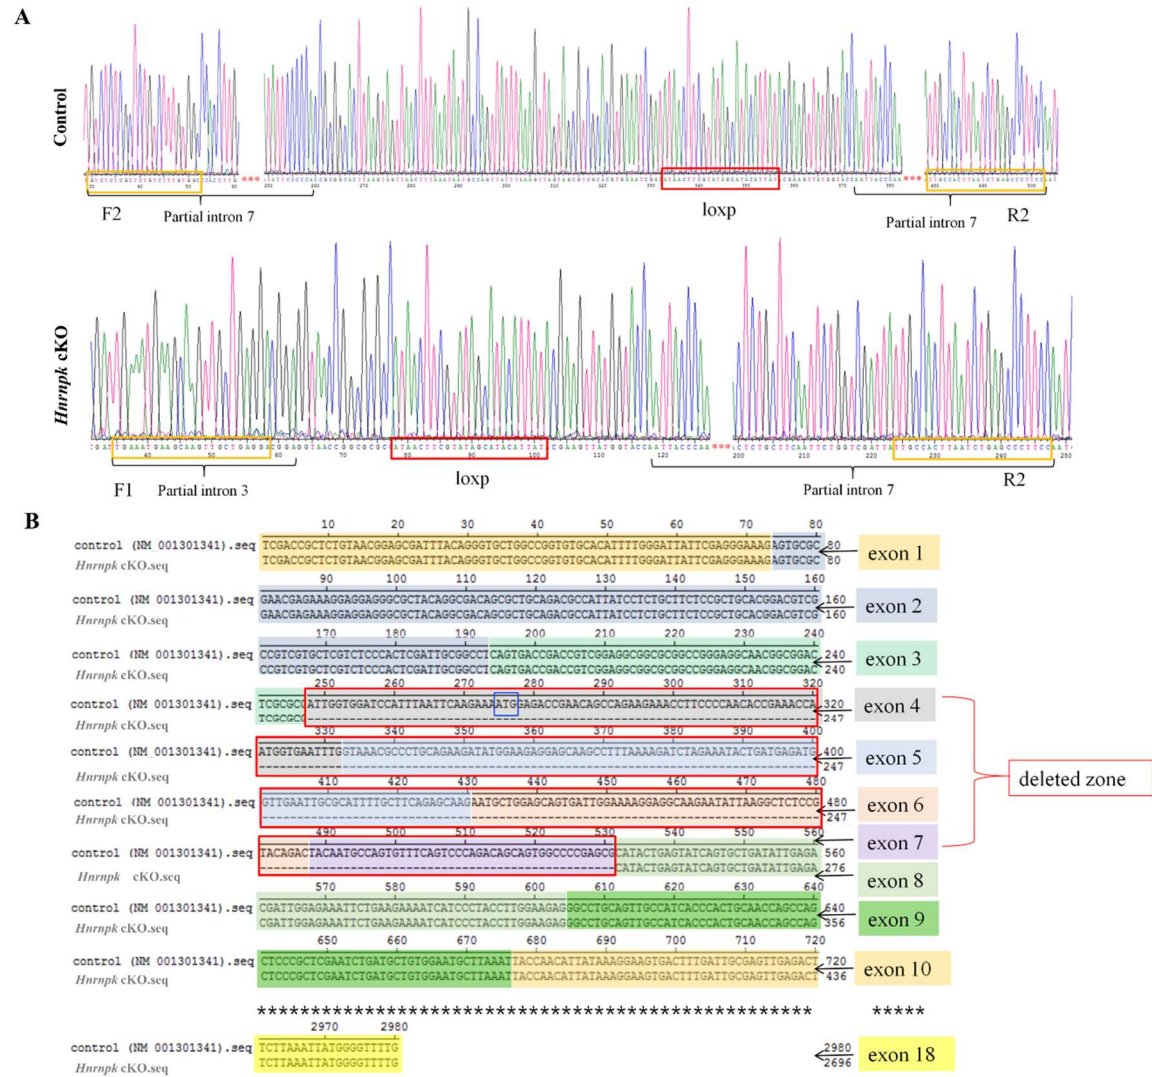

**Supplementary Figure S1. DNA sequencing verified the knockout fragment of *Hnrnpk* gene.** (A) Sequences of individually cloned fragments from WT control and *Hnrnpk* cKO mice genomic DNA of *Hnrnpk* gene. (B) Sequence alignment of exon 1 to exon 10 of the mouse *Hnrnpk* mRNA sequence between WT control (NM\_001301341) and *Hnrnpk* cKO.

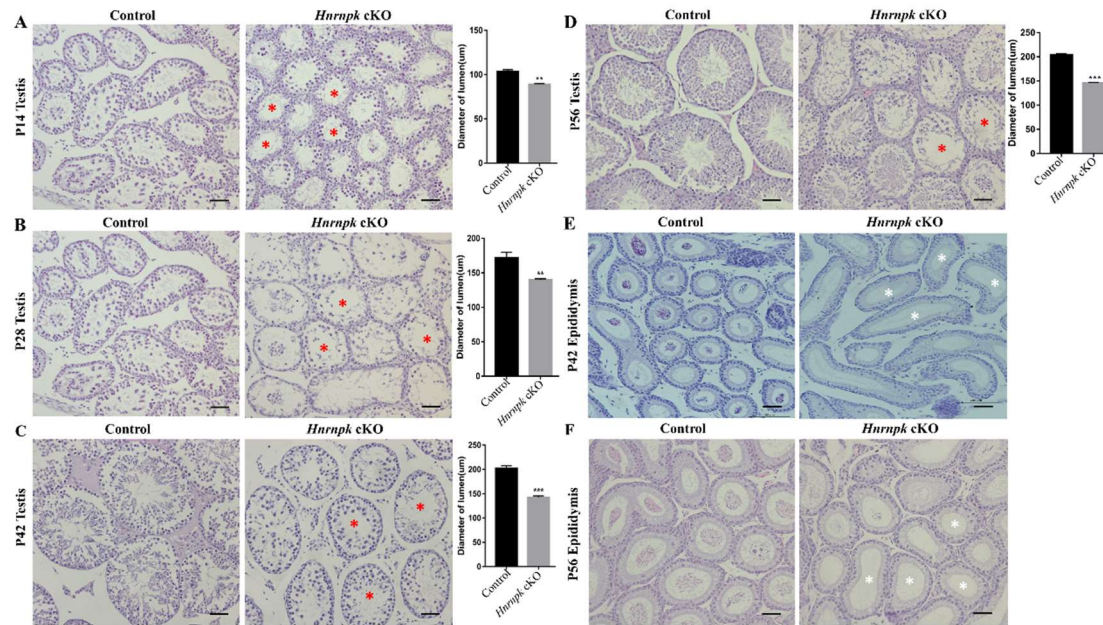

**Supplementary Figure S2. HE staining of mouse testis and epididymis at different stages.**

(A) Typical pictures of testicular tissue morphology of P14 WT control and *Hnrnpk* cKO mice. (B) Typical pictures of testicular tissue morphology of P28 WT control and *Hnrnpk* cKO mice. (C) Typical pictures of testicular tissue morphology of P42 WT control and *Hnrnpk* cKO mice. (D) Typical pictures of testicular tissue morphology of P56 WT control and *Hnrnpk* cKO mice. (E) Typical pictures of epididymis tissue morphology of P42 WT control and *Hnrnpk* cKO mice. (F) Typical pictures of epididymis tissue morphology of P56 WT control and *Hnrnpk* cKO mice. The red star represents the lumen where the germ cell layer is absent, and the white asterisk indicates a noontime cluster of mature sperm in the epididymis.  $P < 0.001$  (\*\*\*),  $P < 0.01$  (\*\*),  $n = 3$ . Bar = 50  $\mu\text{m}$ .

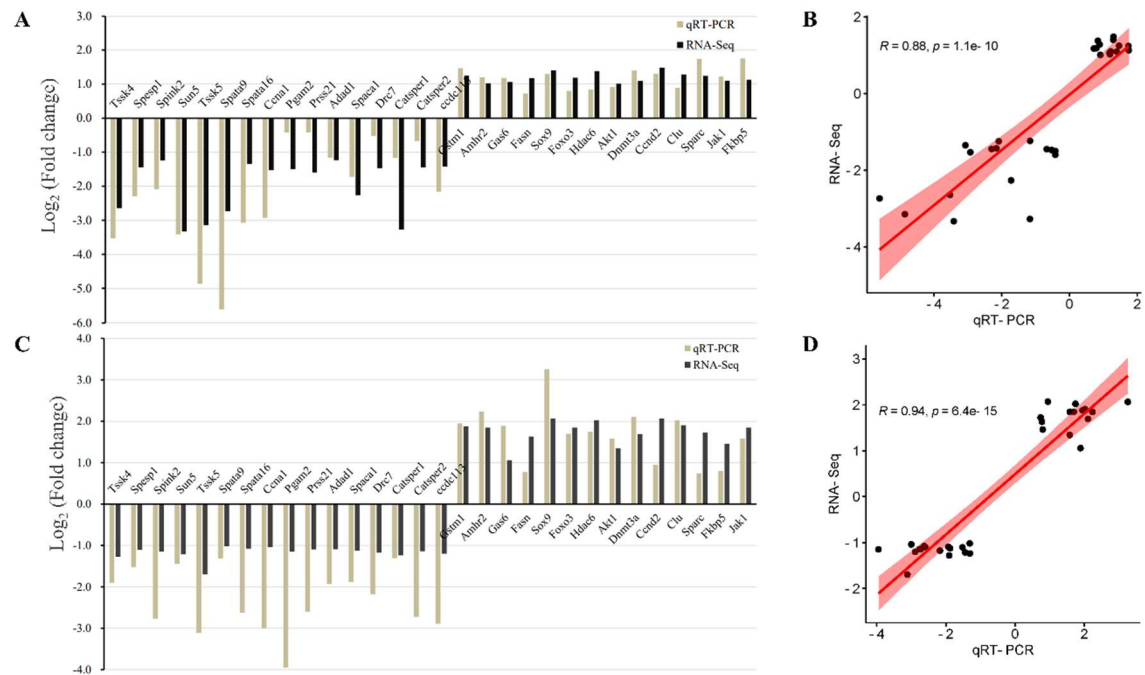

**Supplementary Figure S3. Validation by qRT-PCR analysis of 30 differentially expressed genes from RNA-Seq approach.** (A) The fold-change of differentially expressed genes obtained by RNA-Seq analysis and qRT-PCR analysis in P21 testes. (B) Correlation between the fold-change in RNA-Seq analysis and those obtained by qPCR analysis for the 30 selected genes in P21 testes. (C) The fold-change of differentially expressed genes obtained by RNA-Seq analysis and qRT-PCR analysis in P28 testes. (D) Correlation between the fold-change in RNA-Seq analysis and those obtained by qPCR analysis for the 30 selected genes in P28 testes.

**Supplementary Table S1. Primer sequences for the specific genes of qRT-PCR analysis**

| Gene             | Primer sequence (5'-3')                                | Tm (°C) | Length (bp) | GenBank Accession No. |
|------------------|--------------------------------------------------------|---------|-------------|-----------------------|
| <i>Tssk4</i>     | F:GTGAGATACAGGTAATGAAAGTCC<br>R: GTATACTCGGGATGTGGTCTC | 60      | 82          | XM_03615885<br>0.1    |
| <i>Tssk5</i>     | F: TACCTGGCCTATGCAACAC<br>R: TGATAGCCACCATAGTGTGG      | 60      | 90          | NM_183099.2           |
| <i>Spata4</i>    | F: GCAGAGGAGTGTTTACCACTG<br>R: GGACAGAACGACTCAGGCG     | 60      | 145         | NM_133711.4           |
| <i>Spata9</i>    | F: TCTCTGGAAGACTTGAGGG<br>R:CTGTGATAATCTTAAGATGGTAGGG  | 60      | 91          | XM_03024744<br>1.2    |
| <i>Spata16</i>   | F: TCTACACAGATACCCAAGGAC<br>R: GTCAGCAGATATTGCTGGG     | 60      | 81          | NM_00117791<br>4.1    |
| <i>Sun5</i>      | F: ATAGACCTCCATCCTTGGC<br>R: AACTTGCATCTCCTAGGCC       | 60      | 120         | XM_03025218<br>9.2    |
| <i>Prss21</i>    | F:GAACTCCACGTACAAGTTTGAG<br>R: ATGGCAGACTCTCATCTTCTC   | 60      | 82          | NM_020487.4           |
| <i>Pgam2</i>     | F: AACATCTGGAAGGGATGTCC<br>R: TCTGGTCCAGCTCATAAC       | 60      | 83          | NM_018870.3           |
| <i>Adad1</i>     | F: GCAGTATACTTGTTGGTGATGG<br>R: GTGAGTGCGTCATCAACAC    | 60      | 84          | NM_009350.3           |
| <i>Ccna1</i>     | F: TCAAATGCTCAGCAGAGCT<br>R: TGATTGCTGTGATCTCCTGG      | 60      | 115         | XM_03025240<br>0.1    |
| <i>Spacal</i>    | F: ACACTTGGATTACCTCCA<br>R: ACACTTGGATTACCTCCA         | 60      | 125         | NM_00129044<br>3.1    |
| <i>Drc7</i>      | F: GATCACTCGGTCATAAGCCA<br>R: CTCCTCCTTCAATGAGTTGGT    | 60      | 80          | NM_00104271<br>5.3    |
| <i>Ccdc113</i>   | F: ACTCTGCTCTCAAAACAGAAACA<br>R: GCCTGGATCGTAACTGTGAAA | 60      | 132         | XM_00653100<br>0.3    |
| <i>Catsper 1</i> | F: CTGCCTCTTCCTCTTCTCTG<br>R: GTGGTAAAGATGTTCTGGAAGC   | 60      | 80          | NM_139301.3           |
| <i>Catsper 2</i> | F: TCCGGGAGATACTTGATCCT<br>R: GCTTTATGGAGAAGCGCAC      | 60      | 80          | XM_00653100<br>0.3    |
| <i>Spink2</i>    | F: CTTTGCAGCCTCTCATGAG<br>R: CAGGGTTGAGGTTCTAGG        | 60      | 117         | XM_01124956<br>4.4    |
| <i>Amhr2</i>     | F: GTACTCCCTGGTCTTGCTC<br>R: TCTTGTCCAAGAGCTCTGG       | 60      | 114         | NM_00135657<br>5.1    |
| <i>Clu</i>       | F: AGAAAGAGGATGCTCTGGAG<br>R: CCATCATGGTCTCGTTACAC     | 60      | 83          | NM_013492.3           |

|                     |                                                       |    |     |                    |
|---------------------|-------------------------------------------------------|----|-----|--------------------|
| <i>Sox9</i>         | F: CATGAACGCCTTCATGGTG<br>R: TCTTCTCGCTCTCGTTCAG      | 60 | 130 | NM_011448.4        |
| <i>Gas6</i>         | F: CCAAATGTGTTTCAGAACTTGC<br>R: TGAGGTCTTGGCAGATATGAG | 60 | 80  | NM_019521.2        |
| <i>Foxo3</i>        | F: CAAACGGCTCACTTTGTCC<br>R: CCGGATGGAGTTCTTCCAG      | 60 | 108 | NM_019740.3        |
| <i>Hdac6</i>        | F: CTGGGACAATCATCACCCCT<br>R: GGTAGGATGAGACAGCGAG     | 60 | 95  | XM_01731838<br>9.3 |
| <i>Dnmt3a</i>       | F: AGACGTCTCCAACATGAGC<br>R: ATCTGATCAGGACACAAGCA     | 60 | 121 | XM_00651495<br>6.4 |
| <i>Jak1</i>         | F: CGACATTCTCCAAAGAAGCAG<br>R: AATCATACTGTCCCTGTGCA   | 60 | 114 | XM_00651495<br>6.4 |
| <i>Akt1</i>         | F: CTCAAGAAGGAGGTCATCGT<br>R: GTACTTGAGGGCCGTAAGG     | 60 | 104 | NM_00133110<br>7.1 |
| <i>Sparc</i>        | F: ATTGCAAACATGGCAAGGT<br>R: TCATTGCTGCATACCTTCTC     | 60 | 117 | NM_00129081<br>7.1 |
| <i>Gstm1</i>        | F: CTGTTCTCTGCCTCAGGAG<br>R: ACATAGGTGACCTTGTCCC      | 60 | 122 | NM_010358.5        |
| <i>Fasn</i>         | F: CTGACTCGGCTACTGACAC<br>R: TTAGGGTAGGACCCTCAGG      | 60 | 110 | NM_007988.3        |
| <i>Ccnd2</i>        | F: CATTGAGCACATCCTTCGC<br>R: GCAAACCTGAAGTCGGTAGC     | 60 | 106 | XM_03616578<br>7.1 |
| <i>Fkbp5</i>        | F: GAATATGCTTATGGCTCGGC<br>R: TGAAATCAAGGAGCTCAATCTC  | 60 | 84  | NM_010220.4        |
| <i>Hnrnpk</i>       | F: TTTGGCTGGATCTATTATTGGC<br>R: CTGCTTCACACTGTTCTGC   | 60 | 181 | XM_00651710<br>4.4 |
| <i>18S<br/>rRNA</i> | F: ACCGCAGCTAGGAATAATGGA<br>R: GCCTCAGTTCCGAAAACCA    | 60 | 63  | NR_003278.3        |
| <i>Gapdh</i>        | F: AGGTCGGTGTGAACGGATTG<br>R: GGGGTCGTTGATGGCAACA     | 60 | 95  | NM_00128972<br>6.1 |

**Supplementary Table S2. Primary antibody list**

| Antibody             | Resource           | Usage and dilution |        |
|----------------------|--------------------|--------------------|--------|
| Anti- $\gamma$ H2A.X | Beyotime, AF1201   | IF                 | 1:200  |
| Anti-hnRNPk          | Abcam, ab39975     | IF                 | 1:200  |
|                      | Beyotime, AF1972   | WB                 | 1:1000 |
| Anti-PLZF            | Abcam, ab104854    | IF                 | 1:200  |
| Anti-SYCP3           | Abcam, ab97672-100 | IF                 | 1:100  |
| Anti- Ki67           | BD, 550609         | IF                 | 1:200  |
| Anti-SOX9            | Beyotime, AF2329   | IF                 | 1:50   |
| Anti-GAPDH           | Beyotime, AF0006   | WB                 | 1:1000 |
